# Supplementary material for: Hypodermal responses to protein synthesis inhibition induce systemic developmental arrest and AMPK-dependent survival in Caenorhabditis elegans
Source: PubMed Central journal article supplement (PMC6066256; doi:10.1371/journal.pgen.1007520), 2018-07-18
Supplement: pgen.1007520.s003.pdf [file pgen.1007520.s003.pdf]

A

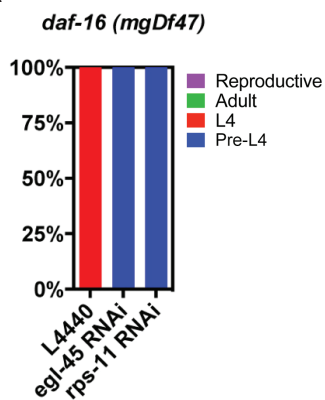

B

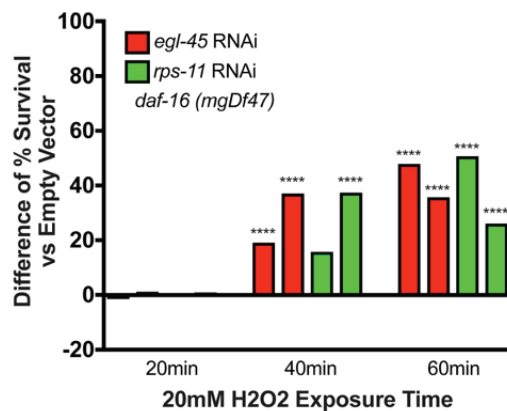

C

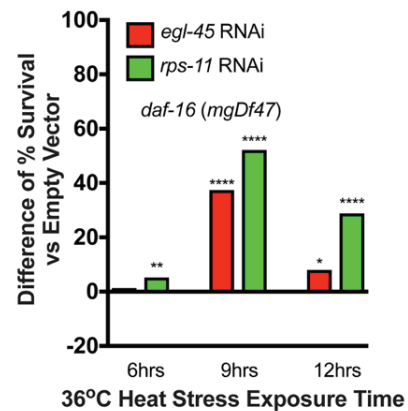

D

| 48hrs                         |               | 30min 1% SDS |      |     |         |             |
|-------------------------------|---------------|--------------|------|-----|---------|-------------|
| Genotype                      | RNAi/Drug     | Alive        | Dead |     | p-value | 2-way ANOVA |
| Wild type                     | Control RNAi  | 0            | 140  | 0%  |         |             |
| Wild type                     | <i>egl-45</i> | 0            | 34   | 0%  | >0.9999 | ns          |
| Wild type                     | <i>rps-11</i> | 0            | 71   | 0%  | >0.9999 | ns          |
| Wild type                     | 0.05mg/ml CHX | 0            | 100  | 0%  | >0.9999 | ns          |
|                               |               |              |      |     |         |             |
| <i>daf-2</i> ( <i>e1368</i> ) | Control RNAi  | 106          | 7    | 94% |         |             |
| <i>daf-2</i> ( <i>e1368</i> ) | <i>egl-45</i> | 0            | 105  | 0%  | <0.0001 | ***         |
| <i>daf-2</i> ( <i>e1368</i> ) | <i>rps-11</i> | 0            | 150  | 0%  | <0.0001 | ***         |
| <i>daf-2</i> ( <i>e1368</i> ) | 0.05mg/ml CHX | 36           | 118  | 23% | <0.0001 | ***         |

Dalton Figure S3
