# Supplementary material for: Hypodermal responses to protein synthesis inhibition induce systemic developmental arrest and AMPK-dependent survival in Caenorhabditis elegans
Source: PubMed Central journal article supplement (PMC6066256; doi:10.1371/journal.pgen.1007520), 2018-07-18
Supplement: pgen.1007520.s009.pdf [file pgen.1007520.s009.pdf]

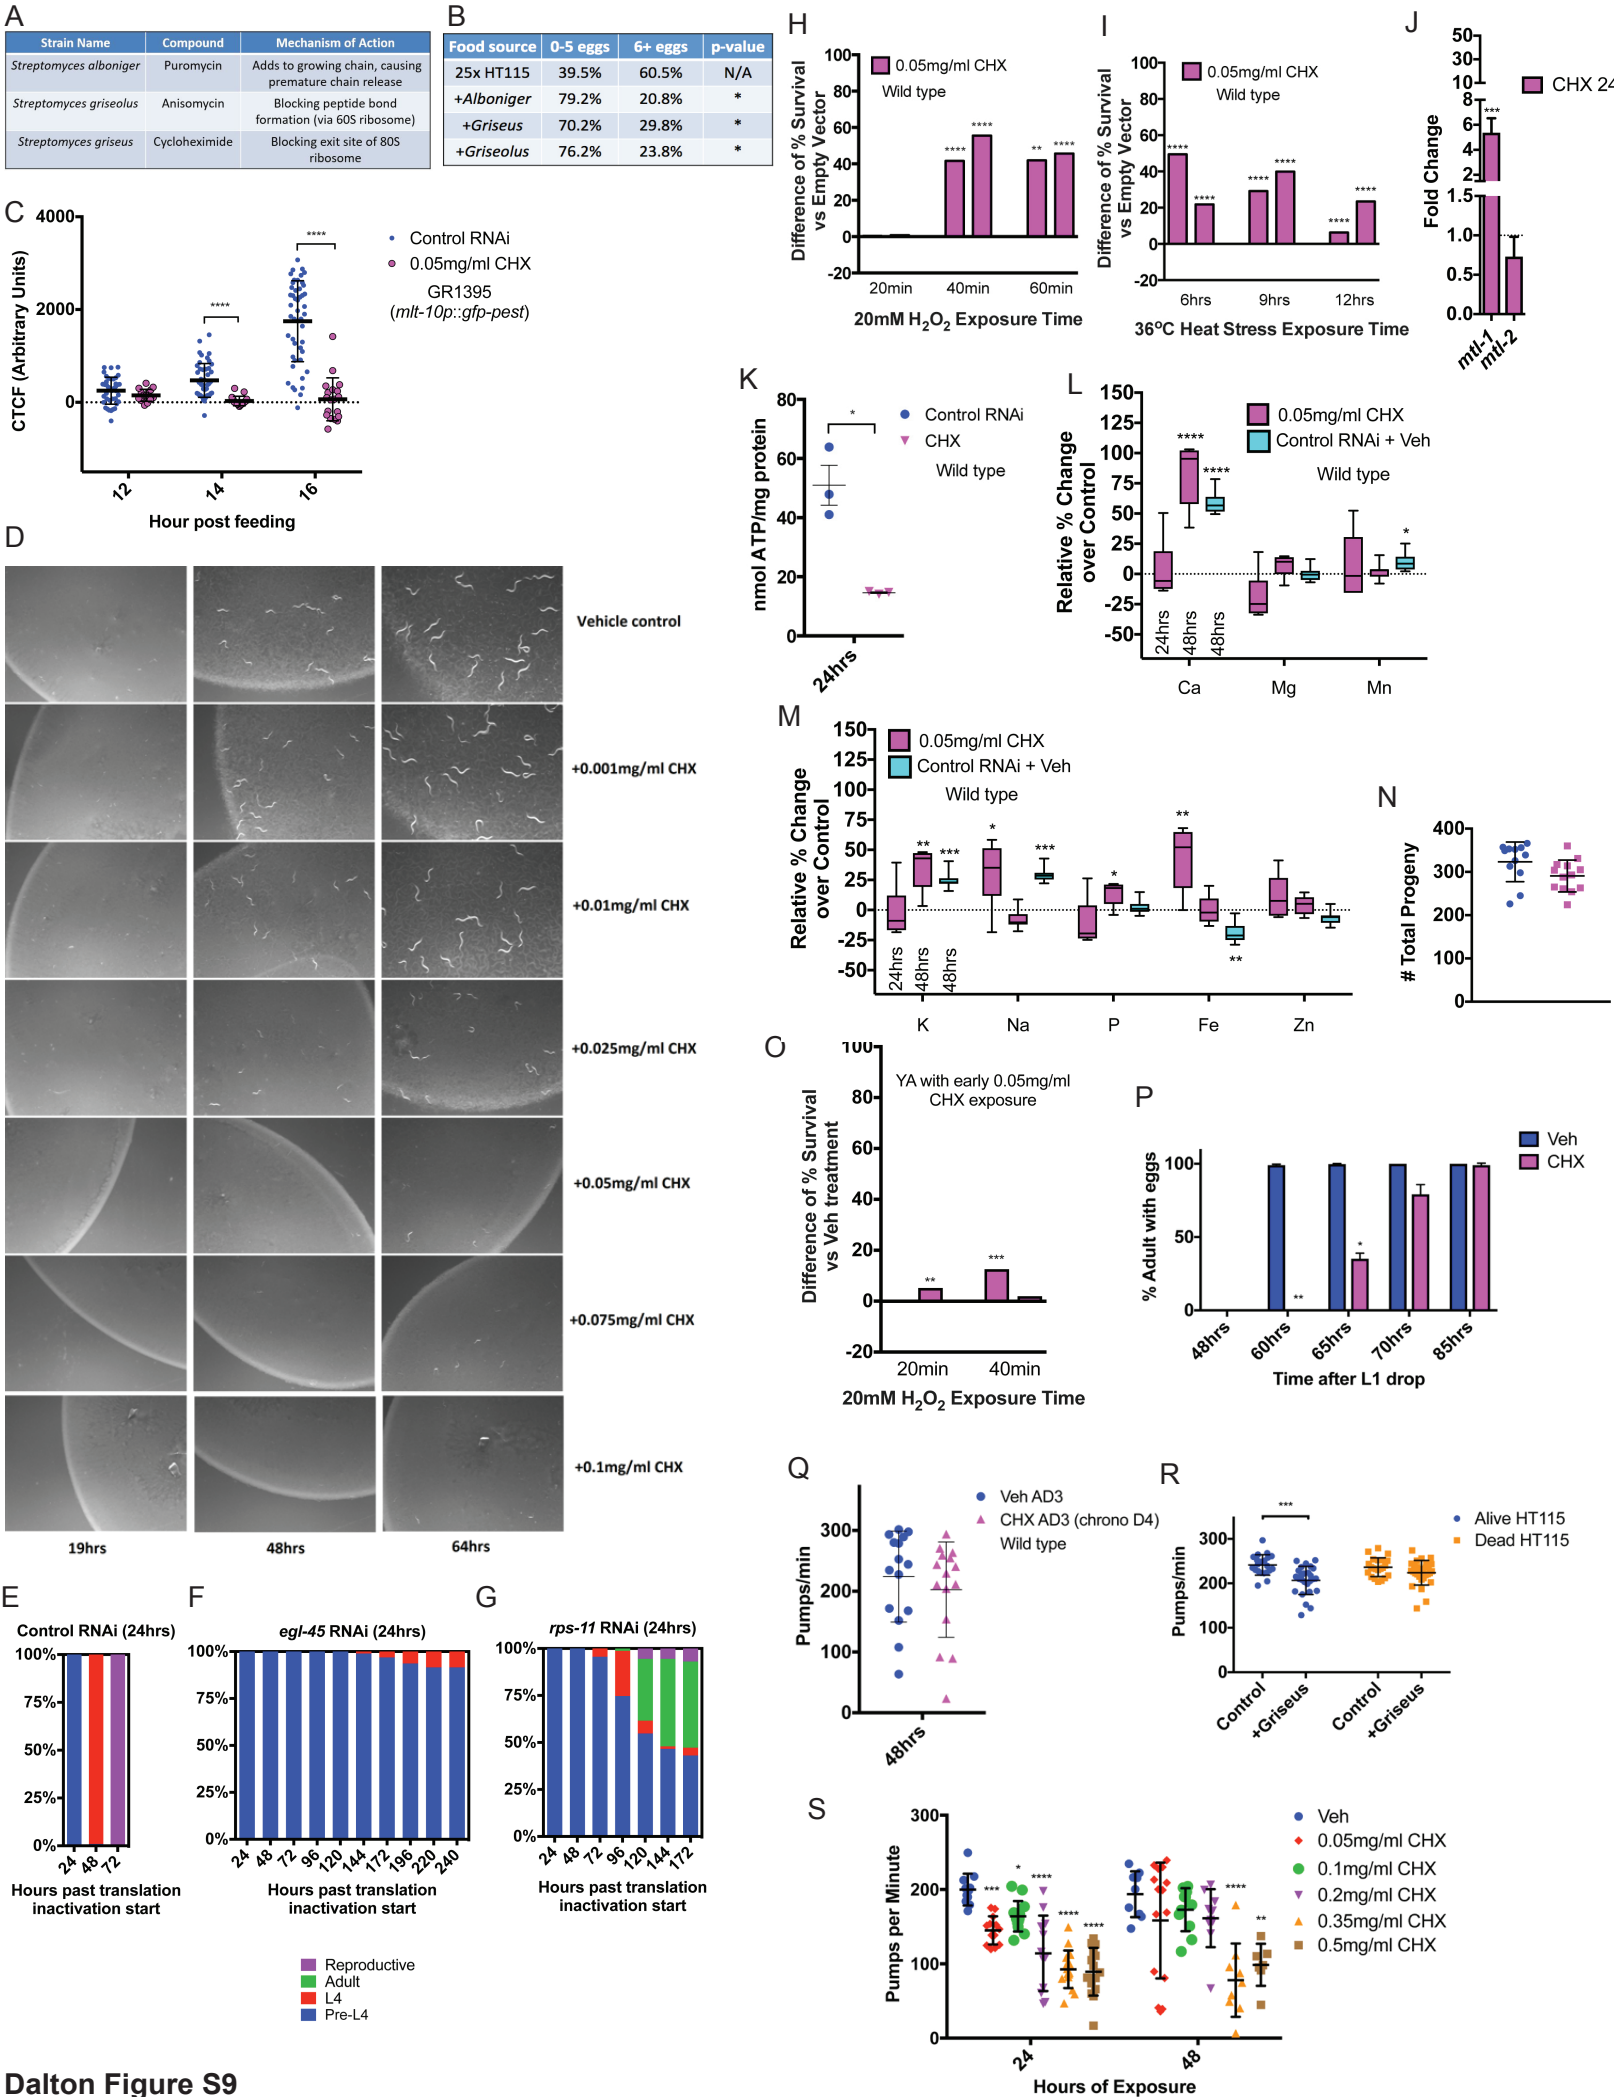

Dalton Figure S9
